# Supplementary material for: Characterization of a novel two-component Na+(Li+, K+)/H+ antiporter from Halomonas zhaodongensis
Source: PubMed Central journal article supplement (PMC5484666; doi:10.1038/s41598-017-04236-0), 2017-06-26
Supplement: 41598_2017_4236_MOESM1_ESM.pdf [file 41598_2017_4236_MOESM1_ESM.pdf]

Supplemental information

**Characterization of a novel two-component Na<sup>+</sup>(Li<sup>+</sup>, K<sup>+</sup>)/H<sup>+</sup> antiporter from *Halomonas zhaodongensis***

Lin Meng, Fankui Meng, Rui Zhang, Zhenglai Zhang, Ping Dong, Kaifu Sun, Jin Chen, Wei Zhang,  
Mingxue Yan, Jincheng Li, Heba Abdel-motaal and Juquan Jiang\*

Department of Microbiology and Biotechnology, College of Life Sciences, Northeast Agricultural  
University, Harbin, PR China

\*Authors for correspondence: Juquan Jiang, Tel: 86-451-55191132. Fax: 86-451-55190413. E-mail

address: [jjqdainty@163.com](mailto:jjqdainty@163.com)

Table S1. The identities of UmpAB from *Halomonas zhaodongensis* with the selected homologs.

| Protein ID | Organism name                 | Accession.version No. | No. of amino acid residues | Identity (%) with Hz_UmpA | Identity (%) with Hz_UmpB |
|------------|-------------------------------|-----------------------|----------------------------|---------------------------|---------------------------|
| Ha_UmpA    | <i>Halomonas</i>              | WP_030072713.1        | 254                        | 93                        | 42                        |
| Ha_UmpB    | <i>alkaliantarctica</i>       | WP_030072711.1        | 271                        | 44                        | 90                        |
| Hs_UmpA    | <i>Halomonas</i>              | WP_016913696.1        | 255                        | 87                        | 44                        |
| Hs_UmpB    | <i>stevensii</i>              | WP_016913695.1        | 262                        | 42                        | 87                        |
| Hsh_UmpA   | <i>Halomonas</i> sp.          | SBR49102.1            | 255                        | 84                        | 42                        |
| Hsh_UmpB   | HL-93                         | SBR49103.1            | 268                        | 43                        | 80                        |
| Hsb_UmpA   | <i>Halomonas</i> sp.          | WP_043518463.1        | 250                        | 74                        | 38                        |
| Hsb_UmpB   | BC04                          | WP_043518462.1        | 257                        | 42                        | 76                        |
| Th_UmpA    | <i>Thiohalospira</i>          | SFD15376.1            | 244                        | 70                        | 41                        |
| Th_UmpB    | <i>halophila</i>              | SFD15402.1            | 258                        | 41                        | 57                        |
| Ve_UmpA    | <i>Vibrio</i>                 | WP_021712002.1        | 241                        | 65                        | 39                        |
| Ve_UmpB    | <i>ezuræ</i>                  | WP_021712001.1        | 265                        | 44                        | 59                        |
| Cs_UmpA    | <i>Candidatus</i>             | ODS32921.1            | 245                        | 59                        | 43                        |
| Cs_UmpB    | <i>Scalindua</i><br>sp. BSI-1 | ODS32922.1            | 267                        | 47                        | 52                        |
| Vx_UmpA    | <i>Vibrio</i>                 | SDH66041.1            | 245                        | 59                        | 38                        |
| Vx_UmpB    | <i>xiamenensis</i>            | SDH66014.1            | 261                        | 44                        | 56                        |
| Dp_UmpA    | <i>Desulfobacula</i>          | SDU55681.1            | 244                        | 57                        | 45                        |
| Dp_UmpB    | <i>phenolica</i>              | SDU55692.1            | 264                        | 45                        | 57                        |
| MI_UmpA    | <i>Methylosarcina</i>         | WP_024299360.1        | 242                        | 57                        | 39                        |
| MI_UmpB    | <i>lacus</i>                  | WP_024299361.1        | 259                        | 41                        | 52                        |
| Mf_UmpA    | <i>Mariprofundus</i>          | WP_009850723.1        | 249                        | 56                        | 43                        |
| Mf_UmpB    | <i>ferrooxydans</i>           | WP_009850724.1        | 255                        | 45                        | 55                        |
| Mm_UmpA    | <i>Methyloglobulus</i>        | WP_023494111.1        | 244                        | 54                        | 38                        |
| Mm_UmpB    | <i>morosus</i>                | WP_023494112.1        | 253                        | 43                        | 58                        |
| Bc_UmpA    | <i>Bacillus</i>               | WP_046525099.1        | 229                        | 40                        | 37                        |
| Bc_UmpB    | <i>campisalis</i>             | WP_046525098.1        | 243                        | 34                        | 33                        |
| Bo_UmpA    | <i>Bacillus</i>               | WP_017754140.1        | 230                        | 38                        | 35                        |
| Bo_UmpB    | <i>oryziterræ</i>             | WP_017754141.1        | 249                        | 32                        | 30                        |
| Pd_UmpA    | <i>Planococcus</i>            | ANU22115.1            | 231                        | 34                        | 32                        |
| Pd_UmpB    | <i>donghaensis</i>            | ANU22114.1            | 242                        | 36                        | 32                        |
| Bm_UmpA    | <i>Bacillus</i>               | WP_022629473.1        | 230                        | 35                        | 34                        |
| Bm_UmpB    | <i>marmarensis</i>            | WP_022629472.1        | 249                        | 36                        | 31                        |
| Pp_UmpA    | <i>Planococcus</i>            | ANU20467.1            | 231                        | 36                        | 32                        |
| Pp_UmpB    | <i>plakortidis</i>            | ANU20468.1            | 247                        | 35                        | 30                        |
| Ea_UmpA    | <i>Enterococcus</i>           | WP_010753786.1        | 227                        | 30                        | 29                        |
| Ea_UmpB    | <i>asini</i>                  | WP_010753785.1        | 258                        | 30                        | 28                        |

Table S2. The strains, plasmids and primers used in this study.

| Strains, plasmids or primers                                                    | Relevant phenotype, genotype or primer sequence                                                                                                  | The source                                          |
|---------------------------------------------------------------------------------|--------------------------------------------------------------------------------------------------------------------------------------------------|-----------------------------------------------------|
| <b>Strains</b>                                                                  |                                                                                                                                                  |                                                     |
| <i>Halomonas zhaodongensis</i> NEAU-ST10-39 <sup>T</sup>                        | type strain of <i>Halomonas zhaodongensis</i> , a moderate halophile and alkaliphile                                                             | Isolated and identified by our group <sup>40</sup>  |
| <i>Escherichia coli</i> KNabc                                                   | <i>nhaA</i> ::Km <sup>R</sup> , <i>nhaB</i> ::Em <sup>R</sup> , <i>chaA</i> ::Cm <sup>R</sup>                                                    | Donated by Professor Terry A. Krulwich <sup>7</sup> |
| <b>Plasmids</b>                                                                 |                                                                                                                                                  |                                                     |
| pUC18                                                                           | Cloning vector                                                                                                                                   | Takara Biotechnology (Dalian) Co.,Ltd., China       |
| pUC-ZD-6                                                                        | pUC18 carrying a 4.2-kb DNA fragment with                                                                                                        | This study                                          |
| pUC-umpA                                                                        | pUC18 carrying the sole <i>umpA</i> gene                                                                                                         | This study                                          |
| pUC-umpB                                                                        | pUC18 carrying the sole <i>umpB</i> gene                                                                                                         | This study                                          |
| pUC-umpAB                                                                       | pUC18 carrying <i>umpA</i> and <i>umpB</i> genes                                                                                                 | This study                                          |
| pUC-ORF2                                                                        | pUC18 carrying the sole ORF2                                                                                                                     | This study                                          |
| pET19                                                                           | Over-expression vector                                                                                                                           | Novagen Ltd., USA                                   |
| pET19-truncated ORF1                                                            | pET19 carrying 5'-end truncated ORF1                                                                                                             | This study                                          |
| pETDuet-1                                                                       | Co-expression vector for two target genes                                                                                                        | Novagen Ltd., USA                                   |
| pETDuet-1-umpA                                                                  | pETDuet-1 carrying the sole <i>umpA</i> gene                                                                                                     | This study                                          |
| pETDuet-1-umpB                                                                  | pETDuet-1 carrying the sole <i>umpB</i> gene                                                                                                     | This study                                          |
| pETDuet-1-umpAB                                                                 | pETDuet-1 carrying <i>umpA</i> and <i>umpB</i> genes                                                                                             | This study                                          |
| <b>Primers</b>                                                                  |                                                                                                                                                  |                                                     |
| F1, the forward primer for <i>umpA</i> in pUC-umpA or <i>umpAB</i> in pUC-umpAB | 5'- <u>GAATTCGATTGTGATGTTTATTGCG</u> -3' ( <i>EcoRI</i> , underlined)                                                                            | This study                                          |
| F2, the forward primer for <i>umpA</i> in pUC-umpB                              | 5'- <u>GAATTCCTGGGGAAGTCGTATCAG</u> -3' ( <i>EcoRI</i> , underlined)                                                                             | This study                                          |
| F3, the forward primer for <i>umpA</i> in pETDuet-1-umpA or pETDuet-1-umpAB     | 5'- <u>GAATTCGATGAATATAGTTTATTTCG</u> -3' ( <i>EcoRI</i> , underlined)                                                                           | This study                                          |
| F4, the forward primer for <i>umpB</i> in pETDuet-1-umpB or pETDuet-1-umpAB     | 5'- <u>CATATGATATTACTCACGATTTTC</u> -3' ( <i>NdeI</i> , underlined)                                                                              | This study                                          |
| F5, the forward primer for 5'-end truncated ORF1 in pET19-truncated ORF1        | 5'- <u>CATATGGTCCCTGCCTCTATTGCGCT</u> -3' ( <i>EcoRI</i> , underlined)                                                                           | This study                                          |
| F6, the forward primer for ORF2 in pUC-ORF2                                     | 5'- <u>GAATTC</u> TTTCGATTGCCCTGCAAACC-3' ( <i>EcoRI</i> , underlined)                                                                           | This study                                          |
| R1, the reverse primer for <i>umpA</i> in pUC-umpA                              | 5'- <u>AAGCTTT</u> TAGGTGCTTCCCGTCAC-3' ( <i>HindIII</i> , underlined)                                                                           | This study                                          |
| R2, the reverse primer for <i>umpB</i> in pUC-umpB or <i>umpAB</i> in pUC-umpAB | 5'- <u>AAGCTT</u> GCTTGTAGAATGTCGTCG-3' ( <i>HindIII</i> , underlined)                                                                           | This study                                          |
| R3, the reverse primer for <i>umpA</i> in pETDuet-1-umpA or pETDuet-1-umpAB     | 5'- <u>AAGCTTT</u> TAGGTGCTTCCCG-3' ( <i>HindIII</i> , underlined)                                                                               | This study                                          |
| R4, the reverse primer for <i>umpB</i> in pETDuet-1-umpB or pETDuet-1-umpAB     | 5'- <u>GGTACCTTACAGGTCTTCTTCAGAGATCAGTTTCTGTTCTGGTCTAAGCGCATTATTATCTCCTT</u> -3' ( <i>KpnI</i> , underlined; <i>myc</i> -tag, double-underlined) | This study                                          |
| R5, the reverse primer for 5'-end truncated ORF1 in pET19-truncated ORF1        | 5'- <u>GGATCCT</u> TAGAAAGCTGCCAAACAGAG-3' ( <i>BamHI</i> , underlined)                                                                          | This study                                          |
| R6, the reverse primer for ORF2 in pUC-ORF2                                     | 5'- <u>GGATCC</u> GTGCTATCCAGCGTGTGCCA-3' ( <i>BamHI</i> , underlined)                                                                           | This study                                          |

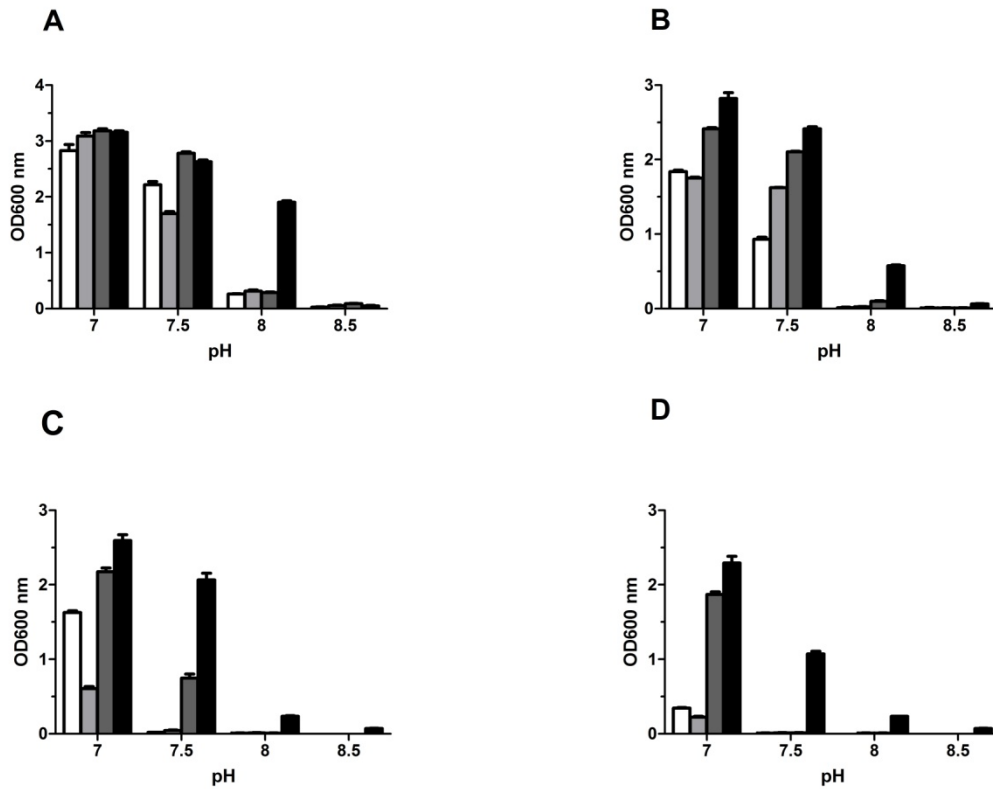

Fig. S1. Growth test for NaCl tolerance or alkaline pH resistance of *E. coli* KNabc by UmpA, UmpB or both.

In order to further test NaCl tolerance or alkaline pH resistance of either UmpA or UmpB, 1 % of the overnight cultures of *E. coli* KNabc/pUC-umpAB (black column), KNabc/pUC-umpA (lightgrey column), KNabc/pUC-umpB (grey column) and KNabc/pUC18 (white column) were grown, respectively, in the LBK medium containing NaCl concentrations of 0 (A), 50 (B), 100 (C) and 150 mM (D) at the pH values from 7.0 to 8.5. The above-mentioned cell growth was ended after 24 h and monitored turbidimetrically at 600 nm. Each data point represents the average of three independent determinations.
